# Supplementary material for: Oligomerization of chromium(iii) and its impact on the oxidation of chromium(iii) by hydrogen peroxide in alkaline solutions
Source: Royal Society of Chemistry journal article supplement (doi:10.1039/b104154c), 2002-01-01
Supplement: b104154c(fig).doc [file b104154c%28fig%29.doc]

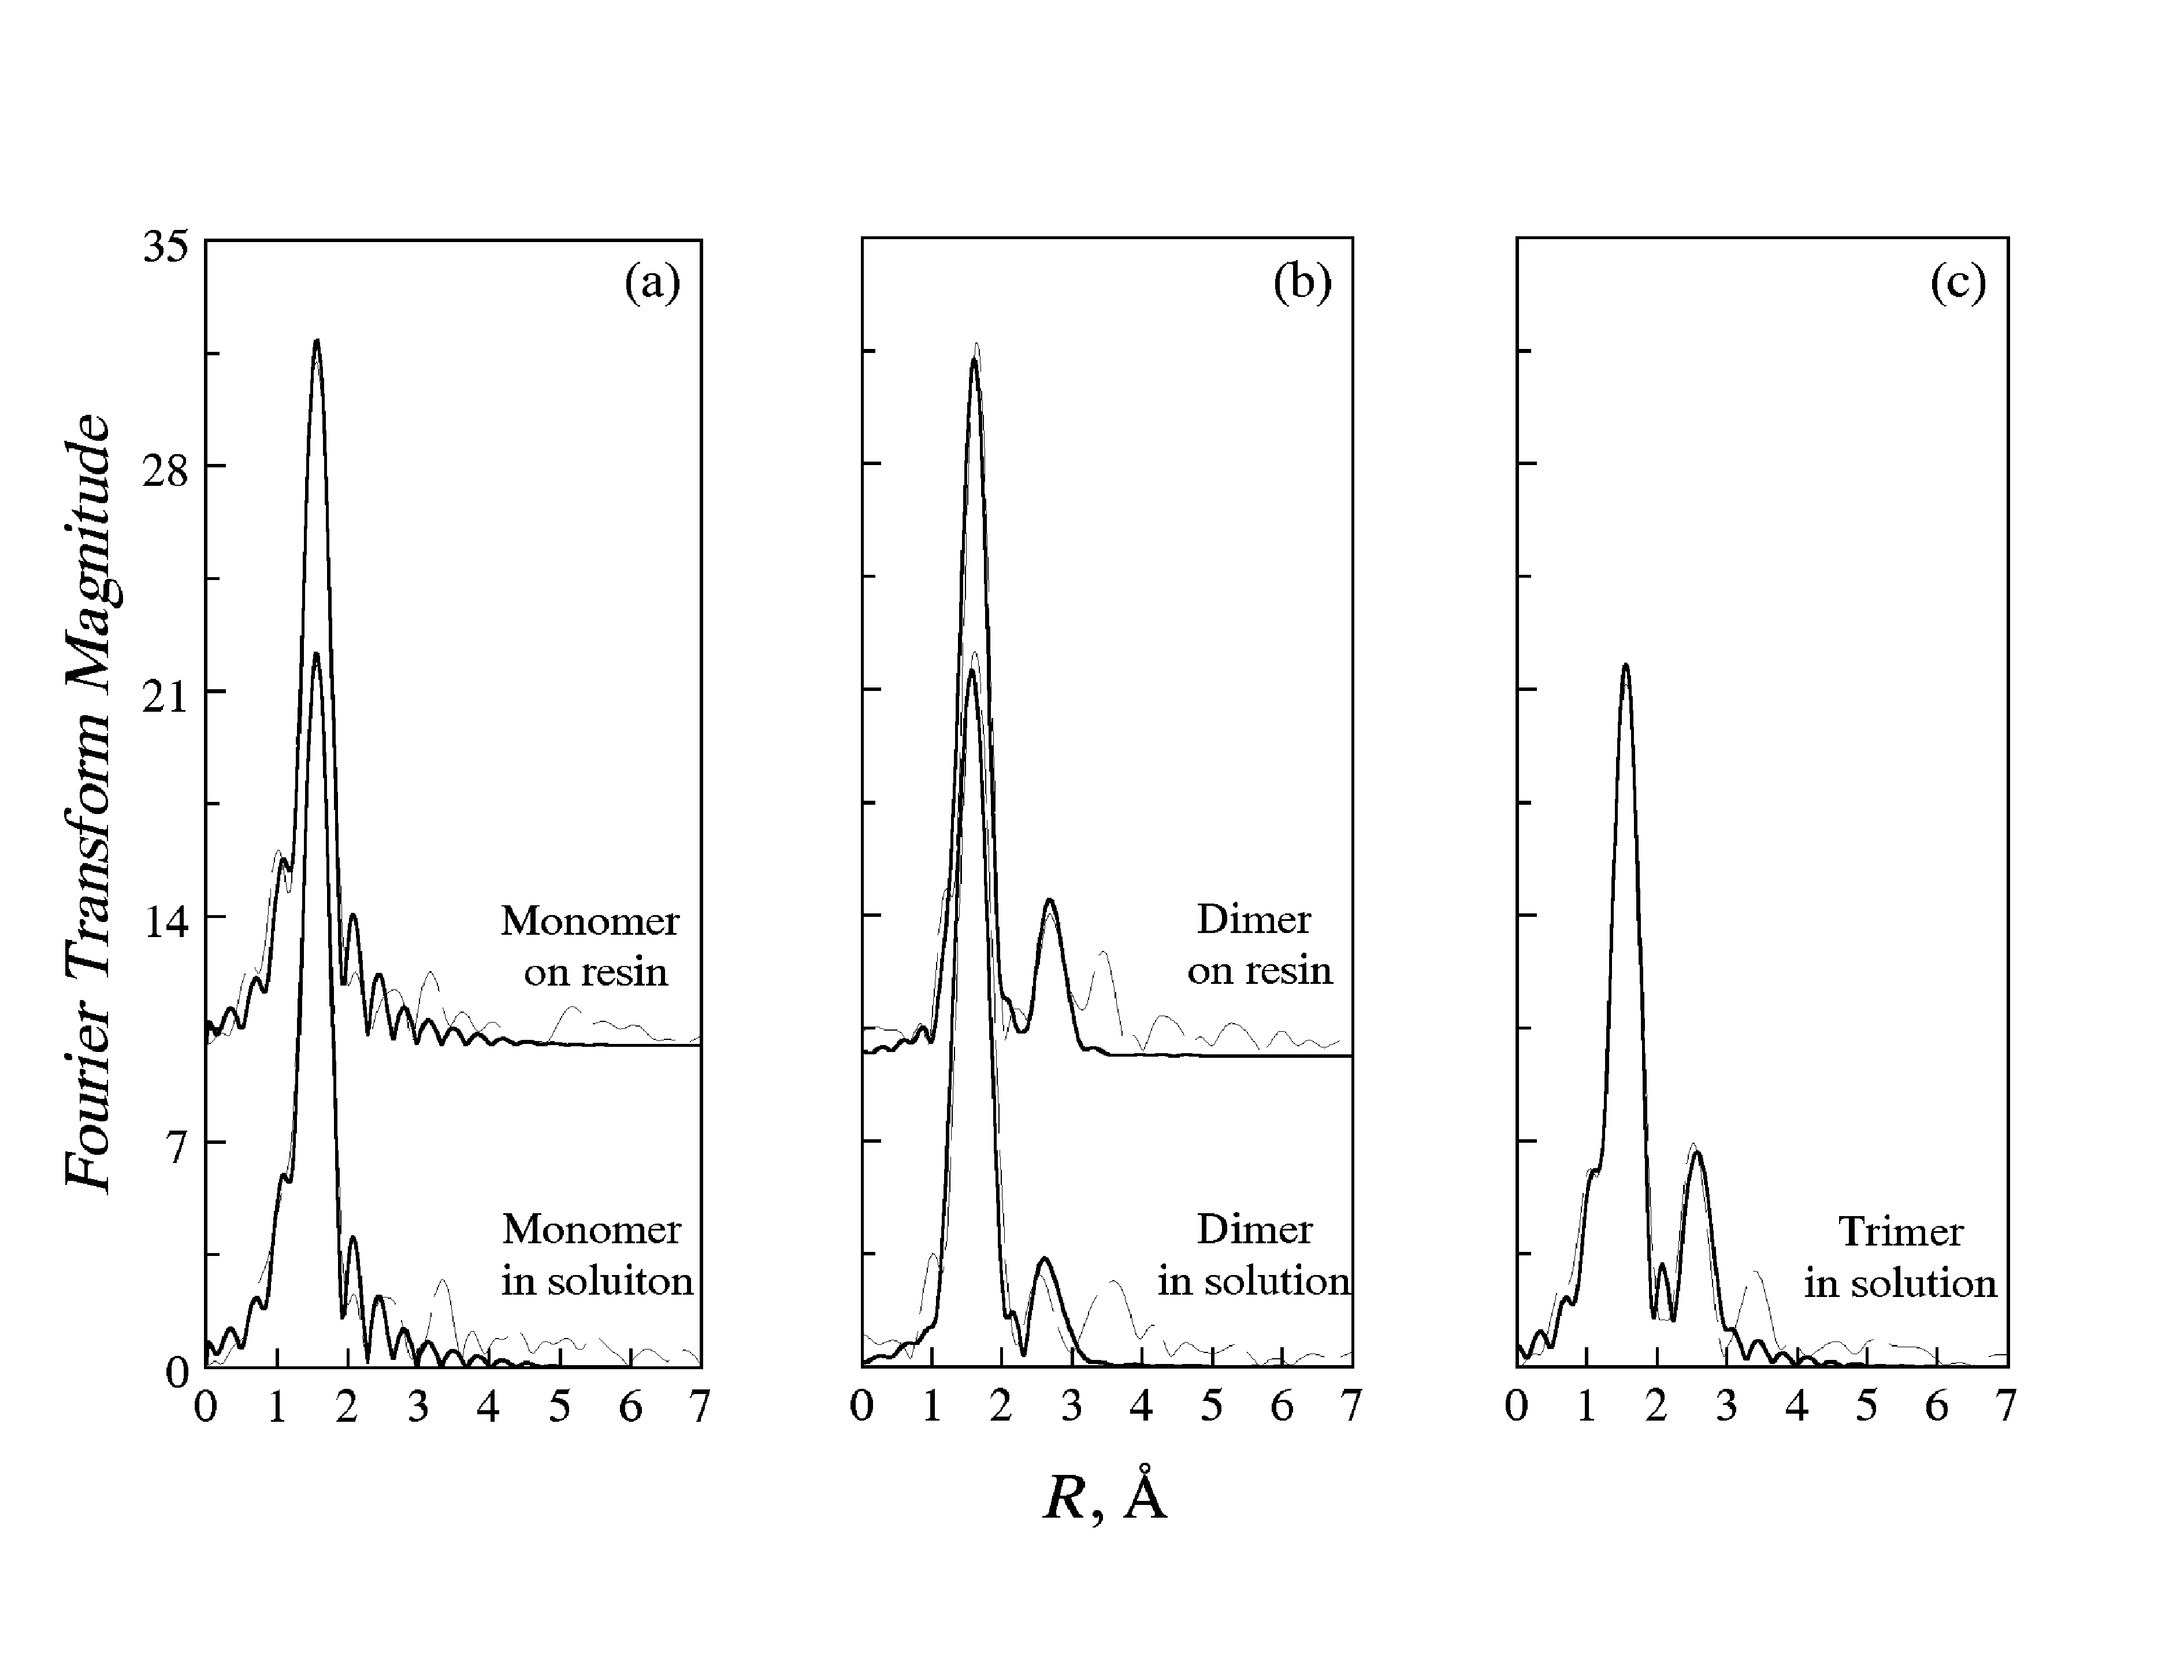


**Fig. S1** The Fourier transforms of the EXAFS spectra of separated chromium(III) oligomers in solution and on resin. The phase shift is not corrected. Dashed line: experimental; solid line: fit. The fitting parameters and results are listed in Table 2. All the solutions were filtered with the Gelman 0.2 m nylon filter.


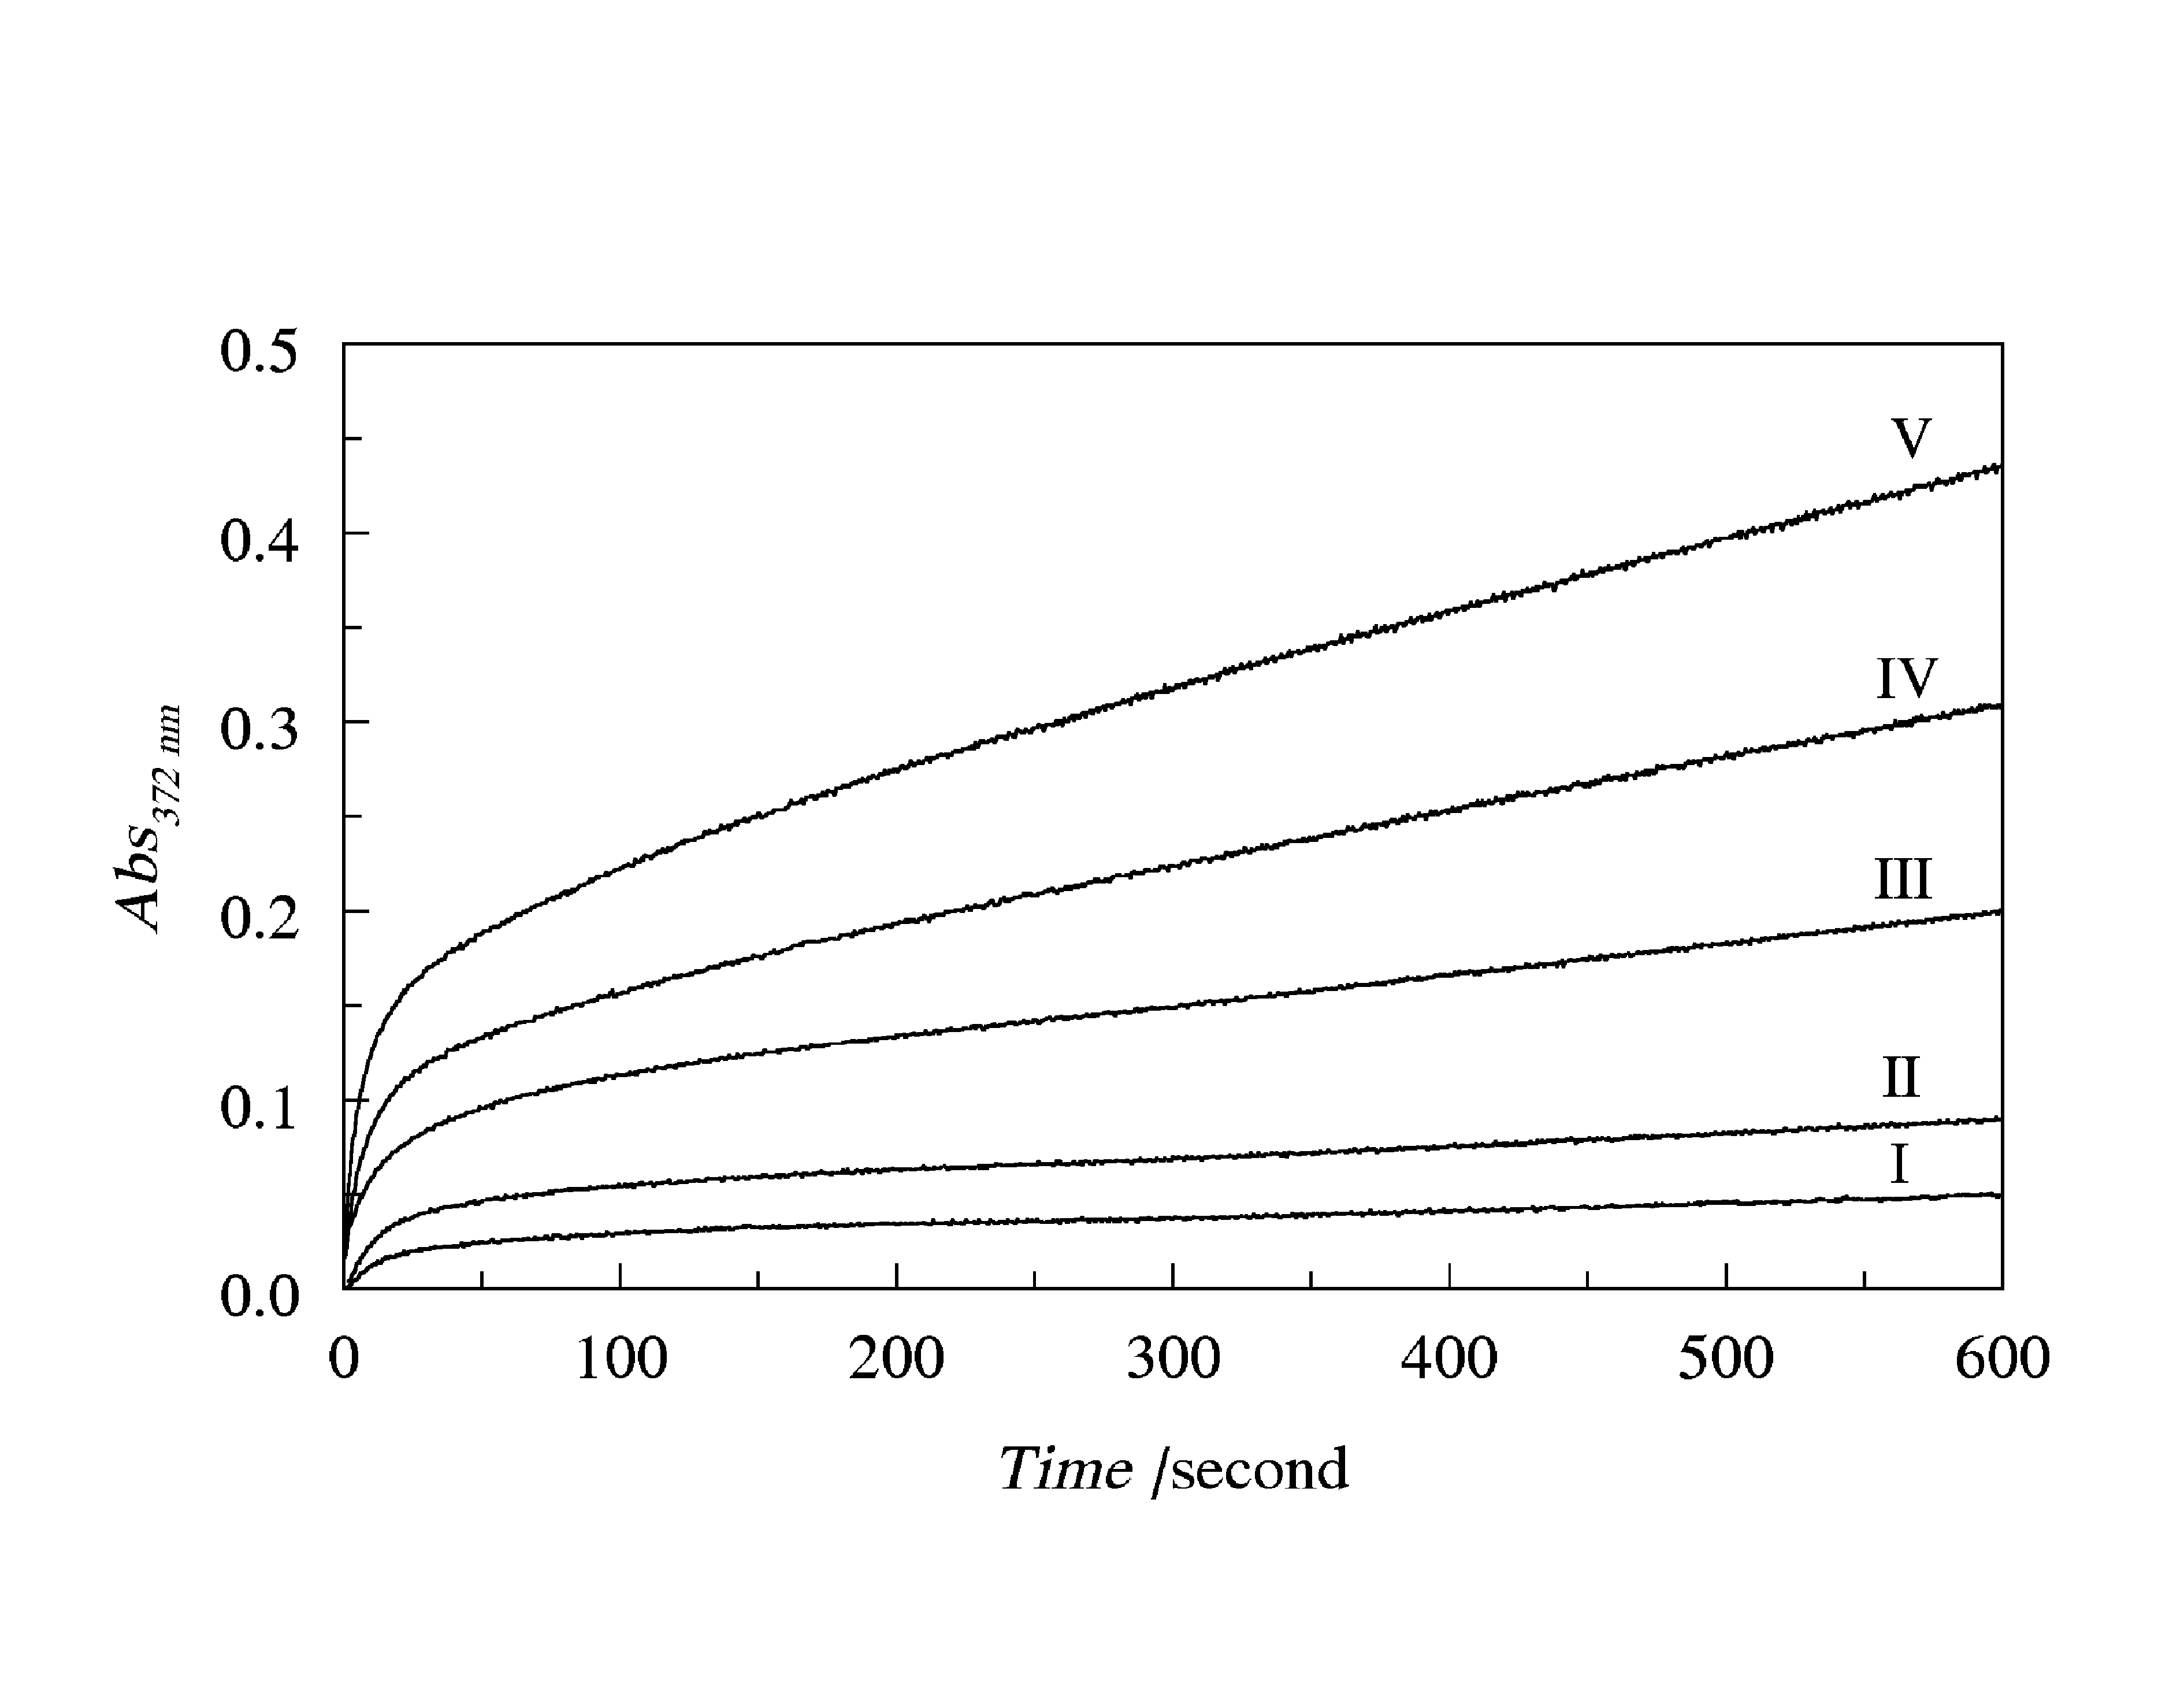


**Fig. S2** The absorbance at 372 nm as a function of time, observed by stopped-flow spectroscopy. *C*NaOH = 2.0  10-1 mol dm-3, *C*H2O2 = 1.03  10-3 mol dm-3, 20 mm pathlength. *C*Cr(III),0 (mol dm-3) = 1.18  10-5 (I), 2.36  10-5 (II), 3.77  10-5 (III), 7.04  10-5 (IV), 1.18  10-4 (V).


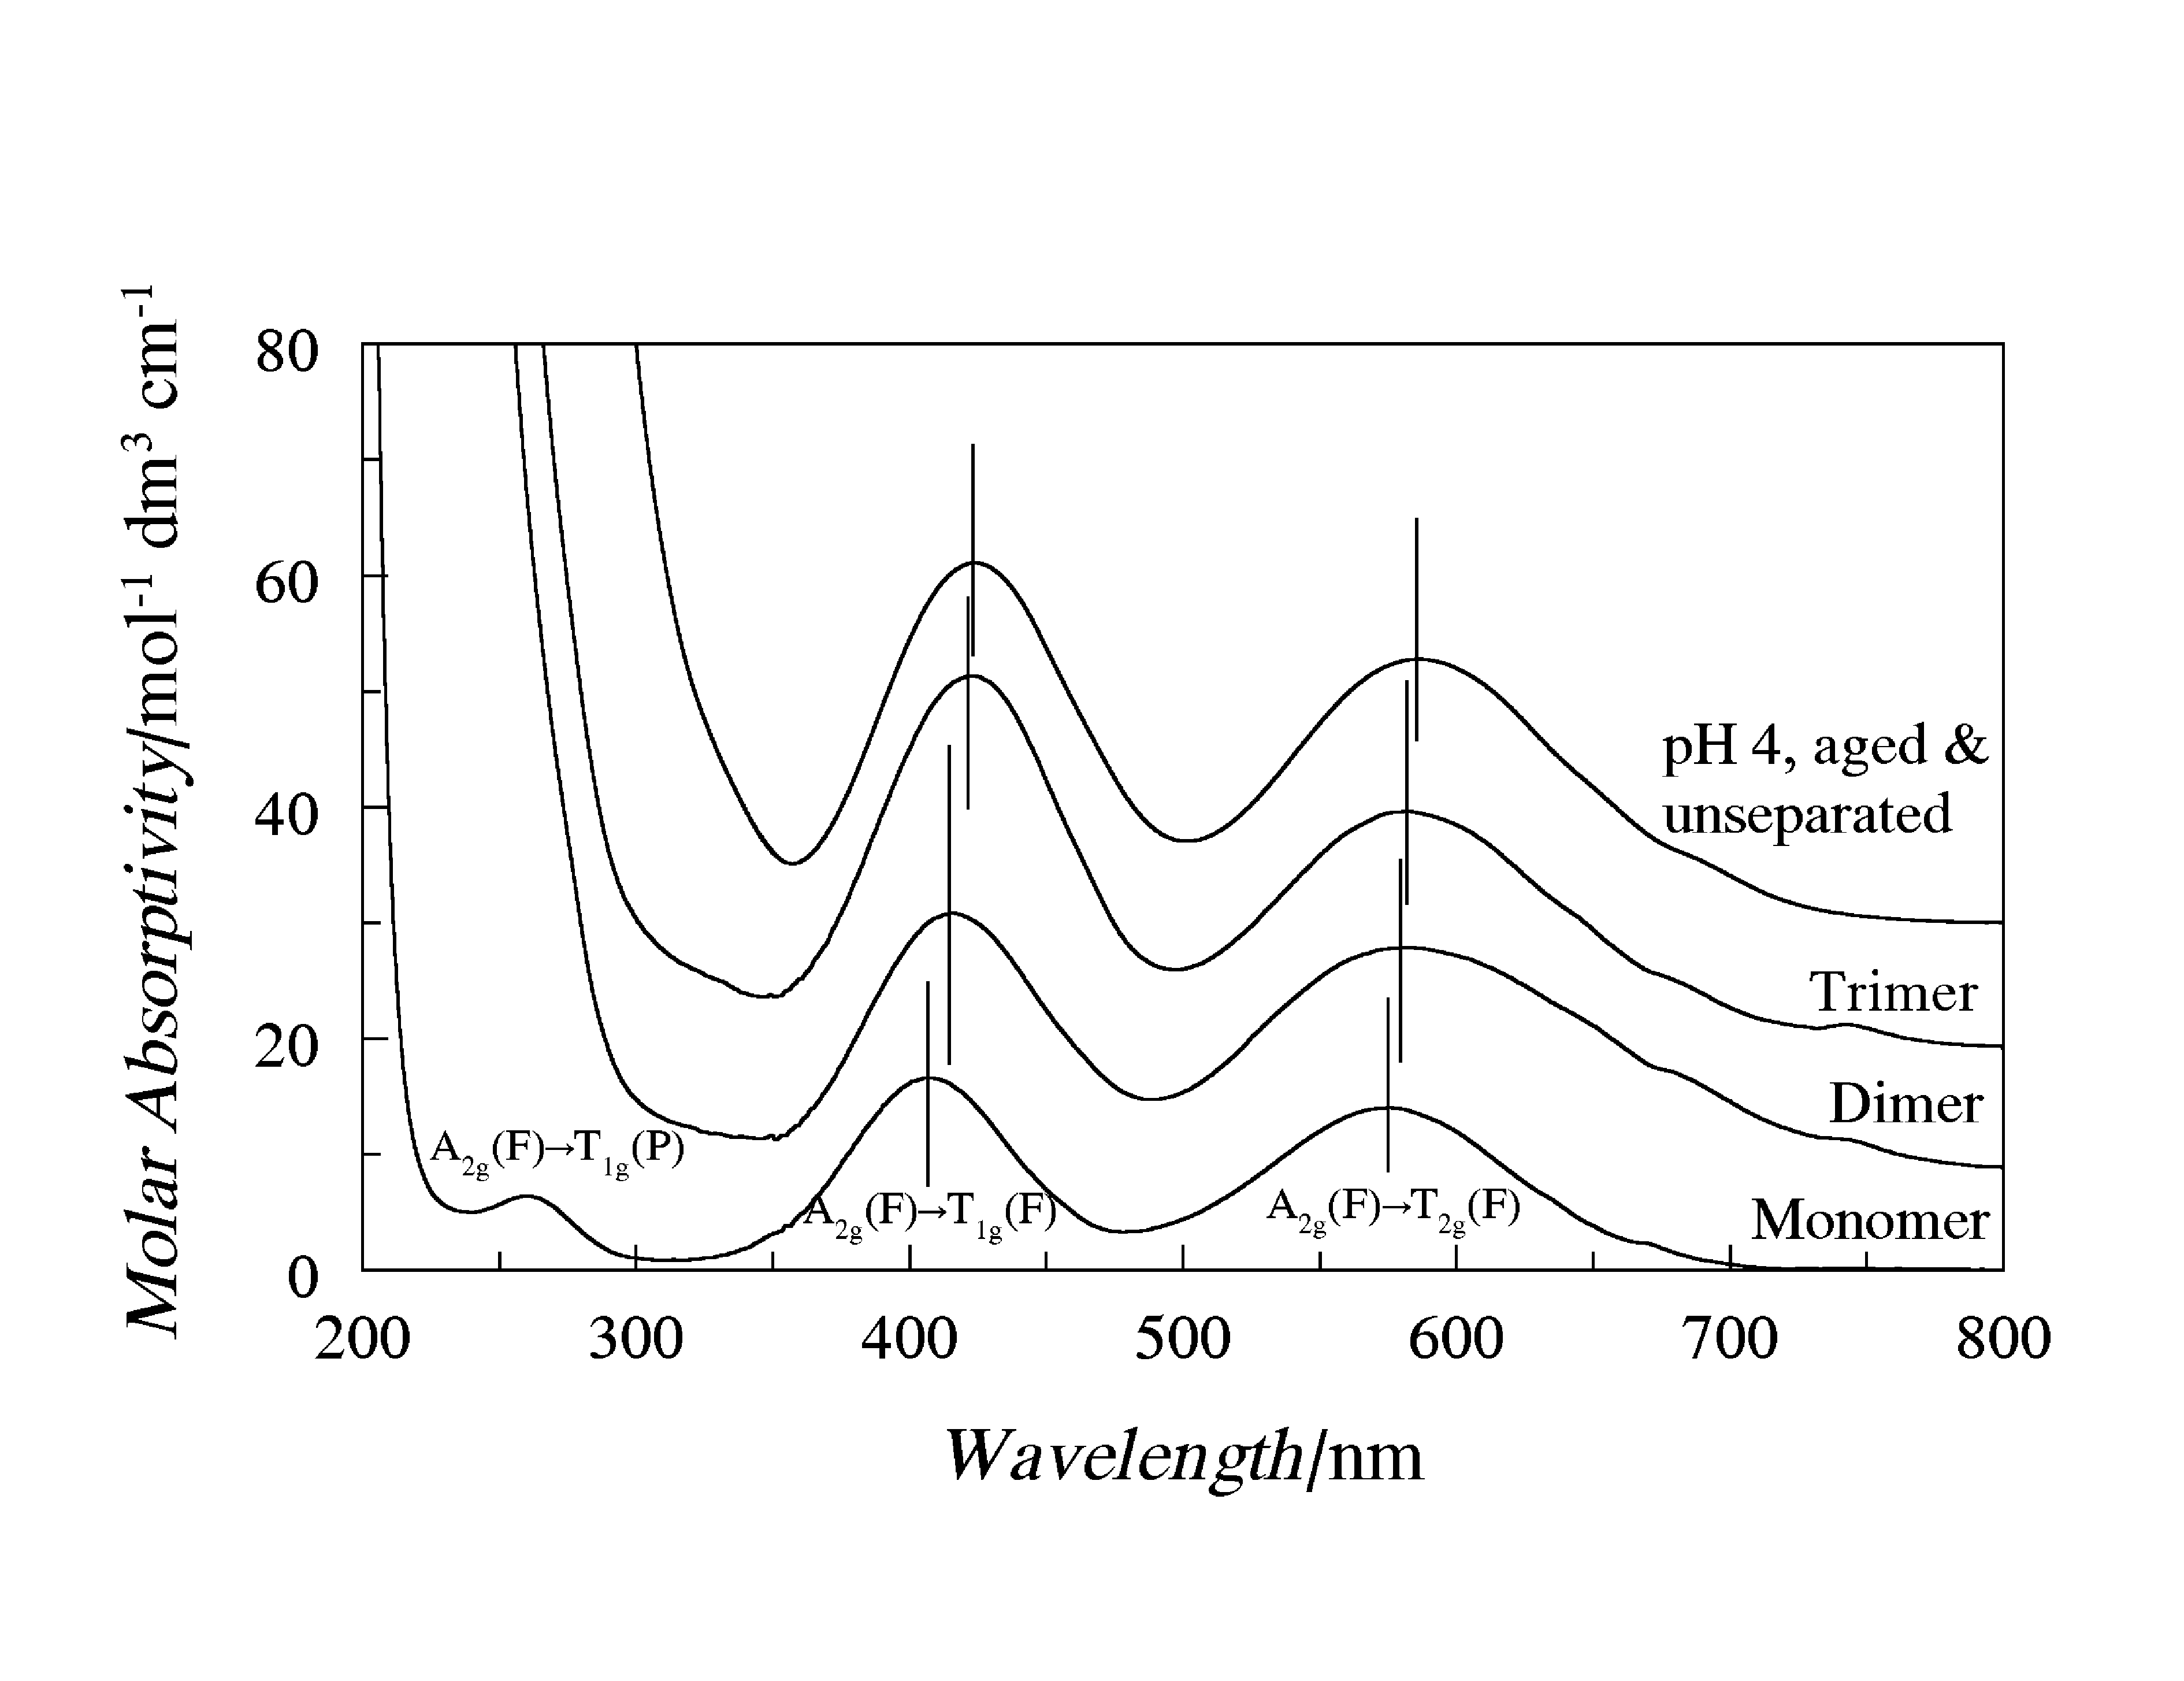


**Fig. S3** UV/Vis absorption spectra of chromium(III) monomer, dimer, trimer and unseparated solutions. All the solutions were filtered with the Gelman 0.2 m nylon filter. The spectra are shifted with respect to the y-coordinate for better viewing.
